# Supplementary material
Source: PubMed Central journal article supplement (PMC5724265)
Supplement: pnas.1710651114.sapp.pdf [file pnas.1710651114.sapp.pdf]

## Supporting Information

### Multiple Pathways in Pressure-Induced Phase Transition of Coesite

*Wei Liu<sup>a</sup>, Xuebang Wu<sup>a</sup>, Yunfeng Liang<sup>a,b,1</sup>, Changsong Liu<sup>a</sup>, Caetano R. Miranda<sup>c</sup>, and*

*Sandro Scandolo<sup>d</sup>*

*<sup>a</sup>Key Laboratory of Materials Physics, Institute of Solid State Physics, Chinese Academy of Sciences, P. O. Box 1129, Hefei 230031, P. R. China*

*<sup>b</sup>Center for Engineering, Research into Artifacts (RACE), The University of Tokyo, Chiba 277-8568, Japan*

*<sup>c</sup>Instituto de Física, Universidade de São Paulo, CP 66318, São Paulo, SP 05315-970, Brazil*

*<sup>d</sup>The Abdus Salam International Centre for Theoretical Physics (ICTP), Trieste, Italy*

*(November 11, 2017)*

<sup>1</sup>Corresponding author: Yunfeng Liang

Postal address: The University of Tokyo  
Room 566, Kashiwa Research Complex 5F, Kashiwa Campus  
5-1-5 Kashiwanoha, Kashiwa  
Chiba 277-8568, Japan

Tel: +81-3-7136-4271

Fax: +81-3-7136-4271

Email: [liang@race.u-tokyo.ac.jp](mailto:liang@race.u-tokyo.ac.jp)

**Supplementary Figures.** In this supplementary document, we have included 7 additional figures: (1) Calculated energy dispersive one-dimensional X-Ray Diffraction (XRD) of selected structures in Path I (**Figure S1**). For comparison, the experimental XRD of coesite at 14.4 GPa is also shown.<sup>1</sup> (2) Si-O-Si angle evolution along Path I (a), II (b) and III (c) at 300K (**Figure S2**). Here, we chose only the oxygen atom site (O1), where Si-O-Si angle is equal to 180° in coesite.<sup>2</sup> (3) Averaged shear stress along Path III at 300K from 28 to 54 GPa under constrained “diagonal” compression (**Figure S3**). (4) Oxygen polyhedral evolution along Path I (a), II (b) and III (c) at 300K (**Figure S4**). The oxygen sublattice was calculated by bond angle analysis as suggested by Ackland and Jones.<sup>3</sup> (5) Snapshots of the supercells at different pressures along Path III at 300K (**Figure S5**). (6) Relative enthalpy  $\Delta H$  as function of pressure for  $P2_1/c^{(I)}$  and  $P-1^{(II-1)}$  phases in the pressure range of 20–32 GPa with *ab initio* calculations<sup>4,5</sup> (a) and in the pressure range of 24-26 GPa with Tangney-Scandolo (TS) potential<sup>6</sup> (b) (**Figure S6**). (7) Relative enthalpy  $\Delta H$  as function of pressure for coesite ( $C2/c$ ), new HPO ( $P1^{(2)}$ ), and  $\alpha$ -PbO<sub>2</sub> phases in the pressure range of 0–36 GPa with *ab initio* calculation (a) and with TS potential (b) (**Figure S7**). In case of TS potential, coesite changes into  $P2_1/c^{(I)}$  or  $P-1^{(II-1)}$  phase at 22 GPa. So, the EOS of coesite was extrapolated to higher pressure using the 3rd order Birch-Murnaghan equation<sup>7</sup>, which, in turn, was used as reference state in Figure S6 and S7.

In addition, lattice parameters and fractional atomic coordinates of selected phases transformed from coesite under high pressure. (a)  $P2_1/c^{(I)}$ , (b)  $P-1^{(I-1)}$ , (c)  $P2_1/c^{(II)}$ , (d)  $P-1^{(II-1)}$ , (e)  $P-1^{(II-2)}$ , (f)  $P-1^{(III)}$ , (g)  $P1^{(2)}$  were shown in **Table S1**.

**Ab initio method for calculating enthalpies of selected phases.** First-principles calculations based on the Density Functional Theory (DFT) were performed by using the Vienna *ab initio* simulation package (VASP).<sup>4,5</sup> The interaction between ions and electrons is described by the projector augmented wave (PAW) method. Exchange correlation functions were taken in a form proposed by Ceperly and Alder (CA) parameterized by Perdew and Zunger within the local density approximation (LDA). An energy cutoff of 550 eV was used for the plane-wave expansion of wave functions and the tetrahedron method with Blöchl corrections was employed to set partial occupancies for each wave functions. Structural optimizations at each pressure were performed with variable shape, volume and atom positions using the conjugate gradient algorithm. The force convergence criterion was less than 0.005 eV/Å in structure optimizations. Crystalline unit cells of these phases were employed in the calculations. For  $P1^{(2)}$  phase, the  $\Gamma$ -centered  $3\times 3\times 3$   $k$ -point mesh was adopted for Brillouin zone sampling according to Monkhorst-Pack scheme; for  $P2_1/c^{(I)}$  phase, the  $\Gamma$ -centered  $6\times 1\times 6$   $k$ -point mesh was adopted; for  $C2/c$  and  $P-1^{(II-1)}$  phases, the  $\Gamma$ -centered  $6\times 3\times 6$   $k$ -point mesh was adopted; for  $\alpha$ -PbO<sub>2</sub> type of silica, the  $\Gamma$ -centered  $9\times 9\times 9$   $k$ -point mesh was adopted. The enthalpies were obtained by fitting the *ab initio* results of the total energy and volume to the 3rd order Birch-Murnaghan equation.<sup>7</sup> The transition pressure from coesite to  $\alpha$ -PbO<sub>2</sub> phase is 1.87 GPa for *ab initio* calculation with LDA approximation. It seems that LDA tends to underestimate the transition pressure from low-pressure tetrahedral phases to high-pressure octahedral phases. For example, the phase transition from coesite to stishovite was reported to be at 1.6 GPa.<sup>8</sup>

## References

- (1) Hemley RJ, Jephcoat AP, Mao HK, Ming LC, Manghnani MH (1988) Pressure-induced amorphization of crystalline silica. *Nature* 334(7):52–54.
- (2) Angel RJ, Shaw CSJ, Gibbs GV (2003) Compression mechanisms of coesite. *Phys Chem Minerals* 30(3):167–176.
- (3) The oxygen sublattice was distinguished by the bond angle analysis method: Ackland GJ, Jones AP (2006) Applications of local crystal structure measures in experiment and simulation. *Phys Rev B* 73(5):054104.
- (4) Kresse G, Hafner J (1993) Ab initio molecular dynamics for liquid metals. *Phys Rev B* 47(1):558-561.
- (5) Kresse G, Furthmüller J (1996) Efficient iterative schemes for ab initio total-energy calculations using a plane-wave basis set. *Phys Rev B* 54(16):11169–11186.
- (6) Tangney P, Scandolo S (2002) An *ab initio* parametrized interatomic force field for silica. *J Chem Phys* 117(19):8898-8904.
- (7) Birch F (1947) Finite elastic strain of cubic crystals. *Phys Rev* 71(11):809–824.
- (8) Demuth, T, Jeanvoine Y, Hafner J, Angyan JG (1999) Polymorphism in silica studied in the local density and generalized-gradient approximations. *J Phys Condensed Matter* 11: 3833–3874.

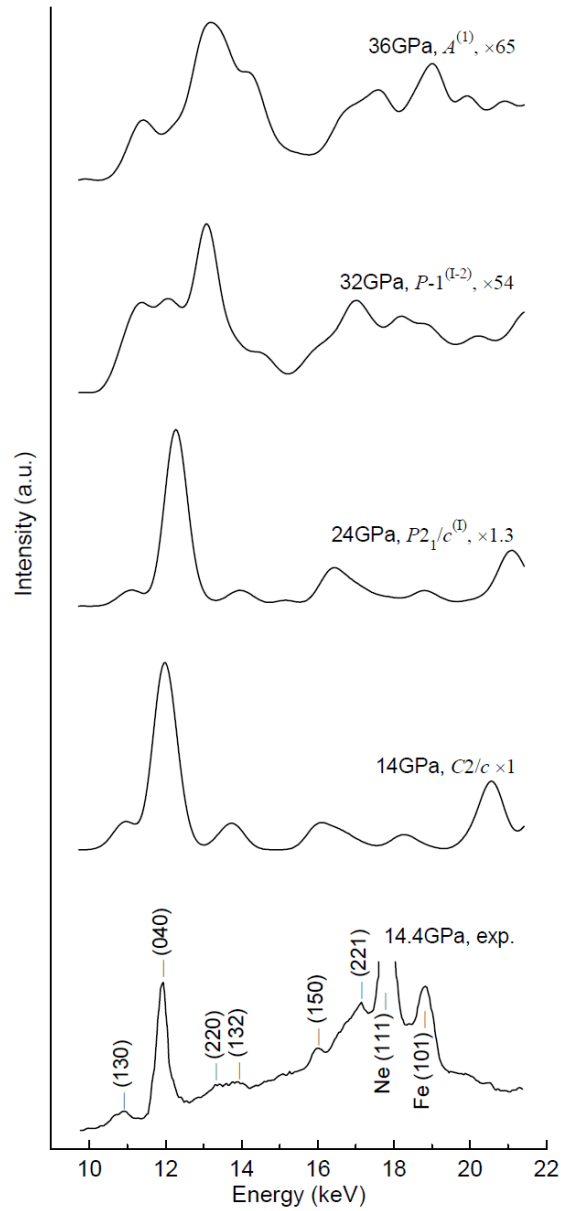

**Figure S1: Calculated energy dispersive one-dimensional XRD of some phases in Path I.** For the convenience of comparison, the experimental XRD of coesite at 14.4 GPa<sup>1</sup> is also shown. The displayed intensity of each calculated XRD is amplified by the number after the symbol "×".

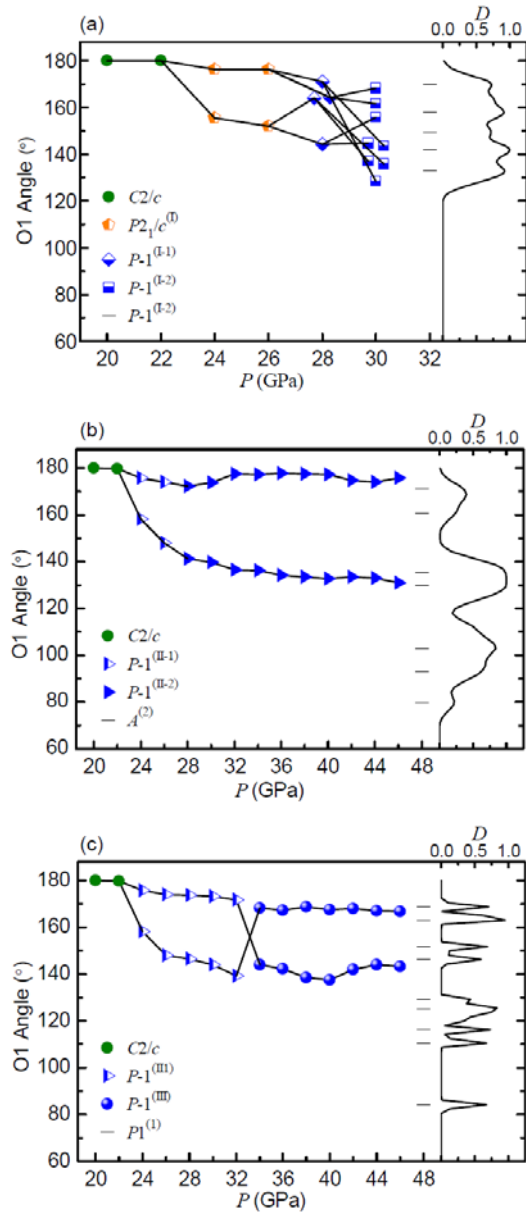

**Figure S2: Si-O-Si angle evolution along Path I (a), II (b) and III (c) at 300K.** The oxygen atom site (O1) was chosen, where Si-O-Si angle is equal to  $180^\circ$  in coesite.<sup>2</sup> Since the Si-O-Si angle values are dispersed in  $P-1^{(I-2)}$  phase in Path I,  $A^{(2)}$  phase in Path II, and  $P1^{(I)}$  phase in Path III, distribution ( $D$ ) curves are presented.

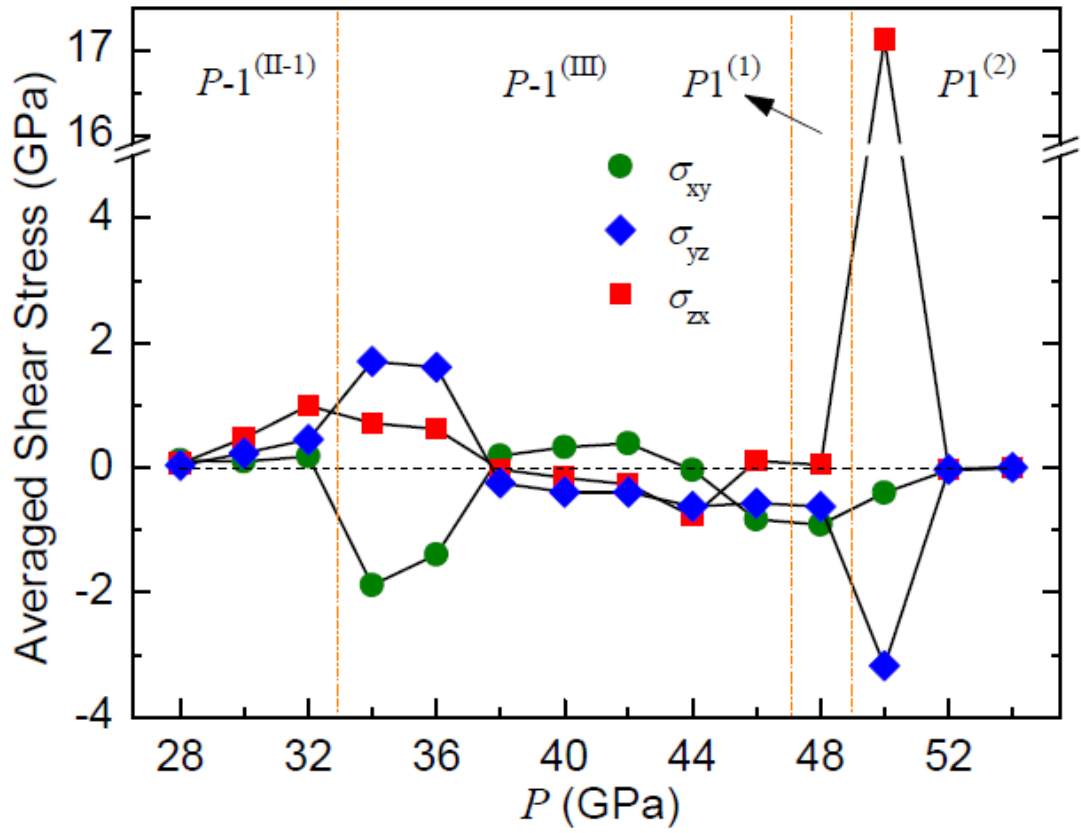

**Figure S3: Averaged shear stress along Path III at 300K from 28 to 54 GPa under constrained “diagonal” compression.** Vertical dash lines indicate the first-order transition pressures along Path III ( $P^{(III)}$ ) as shown in Figure 1. Note we used the midpoint pressure to denote the transition point.

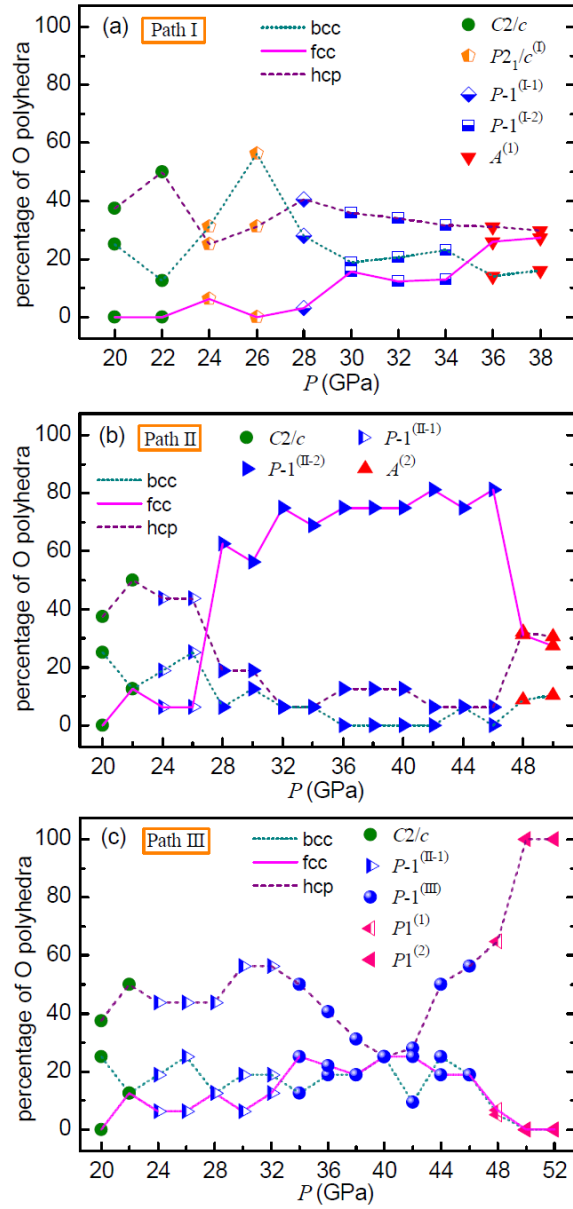

Figure S4: Oxygen polyhedral evolution along Path I (a), II (b) and III (c) at 300K. The oxygen sublattice is calculated by bond angle analysis.<sup>3</sup>

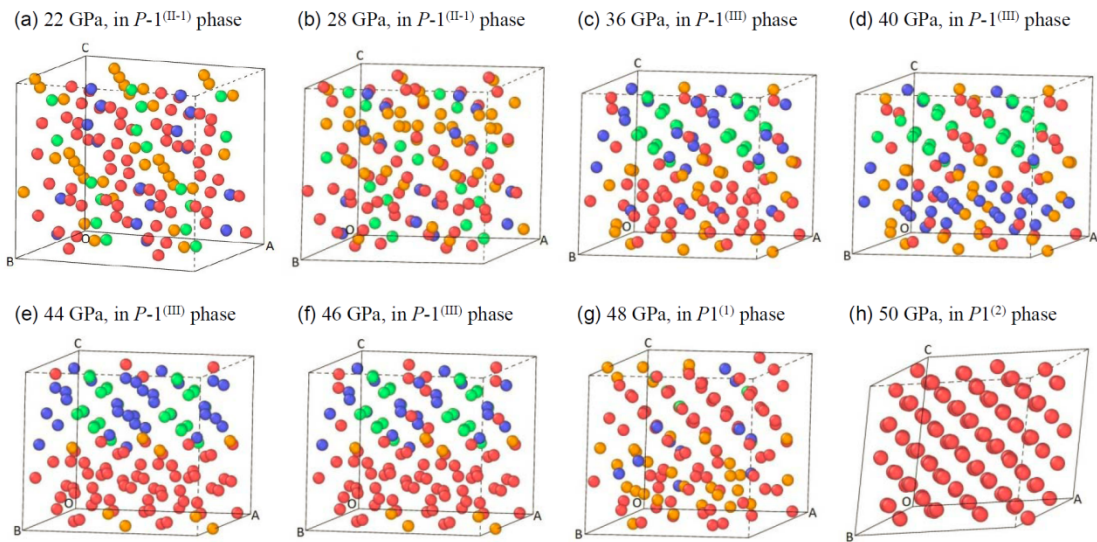

**Figure S5: Snapshots of the supercells at different pressures along Path III at 300K.** Only oxygen atoms are shown. Blue, green and red balls represent oxygen atoms in bcc, fcc and hcp sublattices, respectively. Orange balls represent oxygen atoms in none of the forementioned sublattices. The oxygen sublattice is defined by the bond angle analysis method.<sup>3</sup>



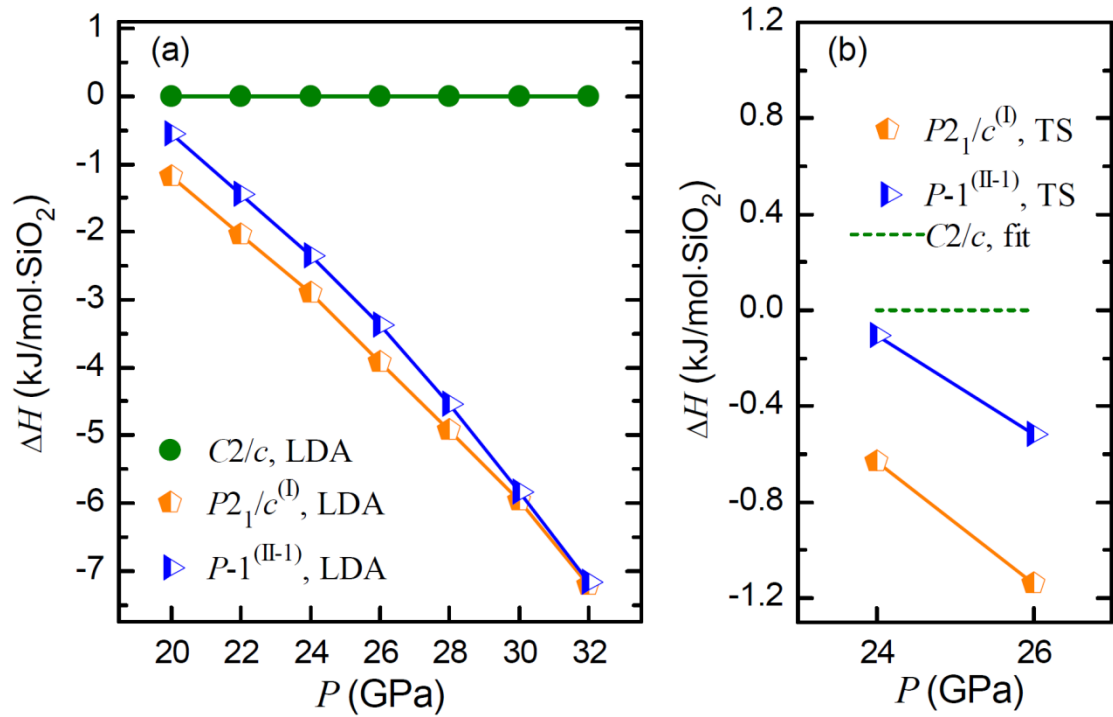

**Figure S6: Relative enthalpy  $\Delta H$  as function of pressure for  $P2_1/c^{(I)}$  and  $P-1^{(II-1)}$  phases in the pressure range of 20–32 GPa with *ab initio* calculation (a) and in the pressure range of 24–26 GPa with TS potential (b).** Note: For *ab initio* calculations, the enthalpies in panel (a) were obtained by fitting the total energy and volume to the 3rd order Birch-Murnaghan equation.<sup>7</sup> In case of TS potential, both  $P2_1/c^{(I)}$  and  $P-1^{(II-1)}$  phases change into coesite phase when recover to 22 GPa, and coesite changes into  $P2_1/c^{(I)}$  or  $P-1^{(II-1)}$  phase (at ~22–24 GPa). The EOS of coesite is extrapolated to higher pressure using the 3<sup>rd</sup> order Birch-Murnaghan equation<sup>7</sup>, which is used as reference state. Path I shows lower enthalpy in both methods as anticipated. The enthalpies of  $P2_1/c^{(I)}$  and  $P-1^{(II-1)}$  phases start to be lower than that of coesite at ~16.0 GPa, and ~18.0 GPa, respectively, according to *ab initio* calculations, which are in good agreement with predictions from TS potential (both at ~22–24 GPa).

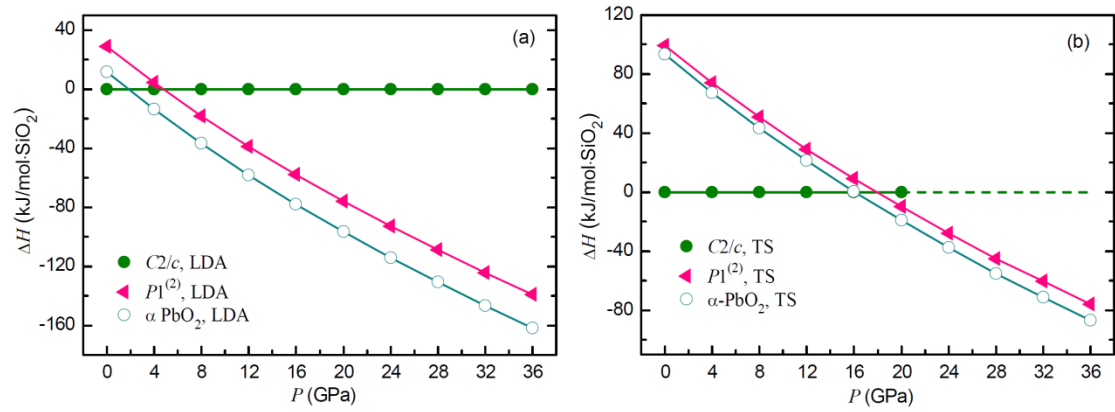

**Figure S7: Relative enthalpy  $\Delta H$  as function of pressure for coesite ( $C2/c$ ), new HPO ( $P1^{(2)}$ ), and  $\alpha\text{-PbO}_2$  phases in the pressure range of 0–36 GPa with *ab initio* calculation (a) and with TS potential (b). Note: Similar to Figure S6, we used 3<sup>rd</sup> order Birch-Murnaghan equation<sup>7</sup> for both Panels (a) and (b).  $\alpha\text{-PbO}_2$  and new HPO phases are stable at high pressure in comparison with coesite in both methods as anticipated.**

## Supplementary Table

**Table S1: Lattice parameters and fractional atomic coordinates of selected phases transformed from coesite under high pressure. (a)  $P2_1/c^{(I)}$ , (b)  $P-1^{(I-1)}$ , (c)  $P2_1/c^{(II)}$ , (d)  $P-1^{(II-1)}$ , (e)  $P-1^{(II-2)}$ , (f)  $P-1^{(III)}$ , (g)  $P1^{(2)}$ .**

(a)  $P2_1/c^{(I)}$ , 24 GPa

| space group $P2_1/c$ No. 14                                 |         |          |          |          |               |
|-------------------------------------------------------------|---------|----------|----------|----------|---------------|
| a=6.7542 Å, b=23.3717 Å, c=6.6249 Å, $\beta=119.3686^\circ$ |         |          |          |          |               |
| number                                                      | element | x        | y        | z        | Wyckoff index |
| 1                                                           | Si      | 0.344096 | 0.319744 | 0.335162 | 4e x, y, z    |
| 2                                                           | Si      | 0.179516 | 0.438935 | 0.128749 | 4e x, y, z    |
| 3                                                           | Si      | 0.809167 | 0.423465 | 0.395304 | 4e x, y, z    |
| 4                                                           | Si      | 0.706379 | 0.315248 | 0.087713 | 4e x, y, z    |
| 5                                                           | Si      | 0.232341 | 0.295913 | 0.710320 | 4e x, y, z    |
| 6                                                           | Si      | 0.278517 | 0.460614 | 0.728929 | 4e x, y, z    |
| 7                                                           | Si      | 0.708699 | 0.444748 | 0.768845 | 4e x, y, z    |
| 8                                                           | Si      | 0.817902 | 0.301276 | 0.705975 | 4e x, y, z    |
| 9                                                           | O       | 0.302523 | 0.380108 | 0.218916 | 4e x, y, z    |
| 10                                                          | O       | 0.761890 | 0.370214 | 0.238125 | 4e x, y, z    |
| 11                                                          | O       | 0.033192 | 0.171078 | 0.215171 | 4e x, y, z    |
| 12                                                          | O       | 0.512292 | 0.576396 | 0.233460 | 4e x, y, z    |
| 13                                                          | O       | 0.601071 | 0.300447 | 0.446719 | 4e x, y, z    |
| 14                                                          | O       | 0.914593 | 0.439426 | 0.032108 | 4e x, y, z    |
| 15                                                          | O       | 0.061776 | 0.443696 | 0.483618 | 4e x, y, z    |
| 16                                                          | O       | 0.443680 | 0.302464 | 0.970622 | 4e x, y, z    |
| 17                                                          | O       | 0.278485 | 0.327069 | 0.529621 | 4e x, y, z    |
| 18                                                          | O       | 0.193572 | 0.449031 | 0.902329 | 4e x, y, z    |
| 19                                                          | O       | 0.741775 | 0.408541 | 0.586561 | 4e x, y, z    |
| 20                                                          | O       | 0.767848 | 0.328520 | 0.892089 | 4e x, y, z    |
| 21                                                          | O       | 0.860886 | 0.265886 | 0.260808 | 4e x, y, z    |
| 22                                                          | O       | 0.644502 | 0.474158 | 0.240175 | 4e x, y, z    |
| 23                                                          | O       | 0.297960 | 0.489965 | 0.311241 | 4e x, y, z    |
| 24                                                          | O       | 0.190841 | 0.270922 | 0.155956 | 4e x, y, z    |

(b)  $P-1^{(I-1)}$ , 28 GPa

| space group $P-1$ No. 2                                                                                      |         |          |          |          |               |
|--------------------------------------------------------------------------------------------------------------|---------|----------|----------|----------|---------------|
| a=6.4552 Å, b=6.6057 Å, c=23.0028 Å, $\alpha=89.0231^\circ$ , $\beta=88.2520^\circ$ , $\gamma=64.2127^\circ$ |         |          |          |          |               |
| number                                                                                                       | element | x        | y        | z        | Wyckoff index |
| 1                                                                                                            | Si      | 0.865657 | 0.672180 | 0.814708 | 2i x, y, z    |
| 2                                                                                                            | Si      | 0.685731 | 0.869689 | 0.938663 | 2i x, y, z    |
| 3                                                                                                            | Si      | 0.323067 | 0.607977 | 0.923848 | 2i x, y, z    |
| 4                                                                                                            | Si      | 0.234969 | 0.917724 | 0.815115 | 2i x, y, z    |

|    |    |          |          |          |            |
|----|----|----------|----------|----------|------------|
| 5  | Si | 0.300053 | 0.095790 | 0.581353 | 2i x, y, z |
| 6  | Si | 0.682389 | 0.373748 | 0.558540 | 2i x, y, z |
| 7  | Si | 0.757494 | 0.281770 | 0.794122 | 2i x, y, z |
| 8  | Si | 0.786203 | 0.264940 | 0.961491 | 2i x, y, z |
| 9  | Si | 0.213089 | 0.235578 | 0.943703 | 2i x, y, z |
| 10 | Si | 0.337510 | 0.297627 | 0.802140 | 2i x, y, z |
| 11 | Si | 0.207734 | 0.722862 | 0.558654 | 2i x, y, z |
| 12 | Si | 0.771341 | 0.777819 | 0.535764 | 2i x, y, z |
| 13 | Si | 0.804926 | 0.583578 | 0.311336 | 2i x, y, z |
| 14 | Si | 0.158959 | 0.829305 | 0.323268 | 2i x, y, z |
| 15 | Si | 0.685836 | 0.193861 | 0.305028 | 2i x, y, z |
| 16 | Si | 0.278721 | 0.190007 | 0.297741 | 2i x, y, z |
| 17 | O  | 0.808245 | 0.768365 | 0.878557 | 2i x, y, z |
| 18 | O  | 0.314685 | 0.742930 | 0.867425 | 2i x, y, z |
| 19 | O  | 0.243409 | 0.272198 | 0.631669 | 2i x, y, z |
| 20 | O  | 0.809731 | 0.305968 | 0.617883 | 2i x, y, z |
| 21 | O  | 0.535001 | 0.794336 | 0.665244 | 2i x, y, z |
| 22 | O  | 0.007929 | 0.761357 | 0.078017 | 2i x, y, z |
| 23 | O  | 0.017312 | 0.283825 | 0.424831 | 2i x, y, z |
| 24 | O  | 0.129132 | 0.564909 | 0.797860 | 2i x, y, z |
| 25 | O  | 0.418195 | 0.969083 | 0.943104 | 2i x, y, z |
| 26 | O  | 0.571740 | 0.517599 | 0.947646 | 2i x, y, z |
| 27 | O  | 0.968124 | 0.027740 | 0.809006 | 2i x, y, z |
| 28 | O  | 0.551974 | 0.015041 | 0.557750 | 2i x, y, z |
| 29 | O  | 0.418362 | 0.464138 | 0.568059 | 2i x, y, z |
| 30 | O  | 0.809095 | 0.469044 | 0.818015 | 2i x, y, z |
| 31 | O  | 0.700207 | 0.098693 | 0.942983 | 2i x, y, z |
| 32 | O  | 0.246423 | 0.424778 | 0.909066 | 2i x, y, z |
| 33 | O  | 0.287609 | 0.114915 | 0.834177 | 2i x, y, z |
| 34 | O  | 0.223826 | 0.908925 | 0.598335 | 2i x, y, z |
| 35 | O  | 0.680588 | 0.603328 | 0.538915 | 2i x, y, z |
| 36 | O  | 0.390098 | 0.761195 | 0.762165 | 2i x, y, z |
| 37 | O  | 0.142469 | 0.779280 | 0.972096 | 2i x, y, z |
| 38 | O  | 0.809127 | 0.685528 | 0.989532 | 2i x, y, z |
| 39 | O  | 0.709503 | 0.873310 | 0.769691 | 2i x, y, z |
| 40 | O  | 0.786903 | 0.188182 | 0.506732 | 2i x, y, z |
| 41 | O  | 0.135280 | 0.243223 | 0.529298 | 2i x, y, z |
| 42 | O  | 0.448065 | 0.711690 | 0.169917 | 2i x, y, z |
| 43 | O  | 0.071824 | 0.459221 | 0.297941 | 2i x, y, z |
| 44 | O  | 0.910672 | 0.940398 | 0.297826 | 2i x, y, z |
| 45 | O  | 0.739059 | 0.389073 | 0.323219 | 2i x, y, z |
| 46 | O  | 0.226983 | 0.019712 | 0.335280 | 2i x, y, z |
| 47 | O  | 0.319424 | 0.664984 | 0.271764 | 2i x, y, z |

|    |   |          |          |          |            |
|----|---|----------|----------|----------|------------|
| 48 | O | 0.643455 | 0.773604 | 0.265218 | 2i x, y, z |
|----|---|----------|----------|----------|------------|

(c)  $P2_1/c^{(II)}$ , 24 GPa

| space group $P2_1/c$ No. 14                                 |         |          |          |          |               |
|-------------------------------------------------------------|---------|----------|----------|----------|---------------|
| a=6.6143 Å, b=11.8496 Å, c=6.7583 Å, $\beta=119.2974^\circ$ |         |          |          |          |               |
| number                                                      | element | x        | y        | z        | Wyckoff index |
| 1                                                           | Si      | 0.618415 | 0.865699 | 0.169386 | 4e x, y, z    |
| 2                                                           | Si      | 0.877596 | 0.636959 | 0.303999 | 4e x, y, z    |
| 3                                                           | Si      | 0.237275 | 0.902187 | 0.282204 | 4e x, y, z    |
| 4                                                           | Si      | 0.252914 | 0.589737 | 0.198000 | 4e x, y, z    |
| 5                                                           | O       | 0.728716 | 0.746153 | 0.208568 | 4e x, y, z    |
| 6                                                           | O       | 0.753347 | 0.153704 | 0.505447 | 4e x, y, z    |
| 7                                                           | O       | 0.516311 | 0.901114 | 0.912686 | 4e x, y, z    |
| 8                                                           | O       | 0.980018 | 0.615123 | 0.565306 | 4e x, y, z    |
| 9                                                           | O       | 0.426117 | 0.850018 | 0.237174 | 4e x, y, z    |
| 10                                                          | O       | 0.085405 | 0.654198 | 0.257534 | 4e x, y, z    |
| 11                                                          | O       | 0.713376 | 0.966704 | 0.665982 | 4e x, y, z    |
| 12                                                          | O       | 0.807852 | 0.542186 | 0.831258 | 4e x, y, z    |

(d)  $P-1^{(II-1)}$ , 26 GPa

| space group $P-1$ No. 2                                                                                      |         |          |          |          |               |
|--------------------------------------------------------------------------------------------------------------|---------|----------|----------|----------|---------------|
| a=6.4574 Å, b=6.5881 Å, c=11.7096 Å, $\alpha=85.7954^\circ$ , $\beta=89.7211^\circ$ , $\gamma=64.3944^\circ$ |         |          |          |          |               |
| number                                                                                                       | element | x        | y        | z        | Wyckoff index |
| 1                                                                                                            | Si      | 0.819407 | 0.559694 | 0.870626 | 2i x, y, z    |
| 2                                                                                                            | Si      | 0.706203 | 0.384905 | 0.654701 | 2i x, y, z    |
| 3                                                                                                            | Si      | 0.328753 | 0.032806 | 0.622866 | 2i x, y, z    |
| 4                                                                                                            | Si      | 0.180909 | 0.959383 | 0.859385 | 2i x, y, z    |
| 5                                                                                                            | Si      | 0.705561 | 0.053139 | 0.905130 | 2i x, y, z    |
| 6                                                                                                            | Si      | 0.800509 | 0.920241 | 0.609830 | 2i x, y, z    |
| 7                                                                                                            | Si      | 0.229547 | 0.535974 | 0.576366 | 2i x, y, z    |
| 8                                                                                                            | Si      | 0.295812 | 0.470280 | 0.900435 | 2i x, y, z    |
| 9                                                                                                            | O       | 0.762525 | 0.482921 | 0.758826 | 2i x, y, z    |
| 10                                                                                                           | O       | 0.210944 | 0.069097 | 0.741270 | 2i x, y, z    |
| 11                                                                                                           | O       | 0.508165 | 0.735509 | 0.158857 | 2i x, y, z    |
| 12                                                                                                           | O       | 0.976093 | 0.308660 | 0.348143 | 2i x, y, z    |
| 13                                                                                                           | O       | 0.085393 | 0.414130 | 0.897842 | 2i x, y, z    |
| 14                                                                                                           | O       | 0.450141 | 0.557344 | 0.613010 | 2i x, y, z    |
| 15                                                                                                           | O       | 0.594546 | 0.861244 | 0.628047 | 2i x, y, z    |
| 16                                                                                                           | O       | 0.925548 | 0.092430 | 0.898885 | 2i x, y, z    |
| 17                                                                                                           | O       | 0.755893 | 0.822453 | 0.852274 | 2i x, y, z    |
| 18                                                                                                           | O       | 0.778226 | 0.120286 | 0.683998 | 2i x, y, z    |

|    |   |          |          |          |            |
|----|---|----------|----------|----------|------------|
| 19 | O | 0.323916 | 0.270779 | 0.591492 | 2i x, y, z |
| 20 | O | 0.250986 | 0.702971 | 0.833490 | 2i x, y, z |
| 21 | O | 0.342265 | 0.958872 | 0.960460 | 2i x, y, z |
| 22 | O | 0.206883 | 0.979415 | 0.520536 | 2i x, y, z |
| 23 | O | 0.865319 | 0.389401 | 0.552600 | 2i x, y, z |
| 24 | O | 0.670838 | 0.515575 | 0.966492 | 2i x, y, z |

(e)  $P-1^{(II-2)}$ , 28 GPa

| space group $P-1$ No. 2                                                                                       |         |          |          |          |               |
|---------------------------------------------------------------------------------------------------------------|---------|----------|----------|----------|---------------|
| a=6.4571 Å, b=6.4882 Å, c=11.5646 Å, $\alpha=91.9300^\circ$ , $\beta=92.0764^\circ$ , $\gamma=119.8414^\circ$ |         |          |          |          |               |
| number                                                                                                        | element | x        | y        | z        | Wyckoff index |
| 1                                                                                                             | Si      | 0.627059 | 0.705777 | 0.868564 | 2i x, y, z    |
| 2                                                                                                             | Si      | 0.489350 | 0.864040 | 0.633572 | 2i x, y, z    |
| 3                                                                                                             | Si      | 0.109335 | 0.258634 | 0.665333 | 2i x, y, z    |
| 4                                                                                                             | Si      | 0.948983 | 0.395821 | 0.889787 | 2i x, y, z    |
| 5                                                                                                             | Si      | 0.096857 | 0.887927 | 0.935307 | 2i x, y, z    |
| 6                                                                                                             | Si      | 0.981923 | 0.746391 | 0.599957 | 2i x, y, z    |
| 7                                                                                                             | Si      | 0.564428 | 0.374106 | 0.587942 | 2i x, y, z    |
| 8                                                                                                             | Si      | 0.472844 | 0.194558 | 0.892846 | 2i x, y, z    |
| 9                                                                                                             | O       | 0.560681 | 0.801612 | 0.755342 | 2i x, y, z    |
| 10                                                                                                            | O       | 0.078087 | 0.418998 | 0.770961 | 2i x, y, z    |
| 11                                                                                                            | O       | 0.732156 | 0.024094 | 0.167491 | 2i x, y, z    |
| 12                                                                                                            | O       | 0.203654 | 0.471996 | 0.347338 | 2i x, y, z    |
| 13                                                                                                            | O       | 0.448195 | 0.453183 | 0.891872 | 2i x, y, z    |
| 14                                                                                                            | O       | 0.619377 | 0.121473 | 0.590131 | 2i x, y, z    |
| 15                                                                                                            | O       | 0.956943 | 0.979920 | 0.663544 | 2i x, y, z    |
| 16                                                                                                            | O       | 0.160615 | 0.631646 | 0.967765 | 2i x, y, z    |
| 17                                                                                                            | O       | 0.869547 | 0.688731 | 0.865694 | 2i x, y, z    |
| 18                                                                                                            | O       | 0.230307 | 0.774114 | 0.623191 | 2i x, y, z    |
| 19                                                                                                            | O       | 0.368199 | 0.304908 | 0.674709 | 2i x, y, z    |
| 20                                                                                                            | O       | 0.699826 | 0.236391 | 0.835440 | 2i x, y, z    |
| 21                                                                                                            | O       | 0.011274 | 0.137177 | 0.929838 | 2i x, y, z    |
| 22                                                                                                            | O       | 0.067113 | 0.315391 | 0.535202 | 2i x, y, z    |
| 23                                                                                                            | O       | 0.549587 | 0.677466 | 0.546520 | 2i x, y, z    |
| 24                                                                                                            | O       | 0.620658 | 0.886389 | 0.976818 | 2i x, y, z    |

(f)  $P-1^{(III)}$ , 36 GPa

| space group $P-1$ No. 2                                                                                      |         |          |          |          |               |
|--------------------------------------------------------------------------------------------------------------|---------|----------|----------|----------|---------------|
| a=5.8261 Å, b=6.4775 Å, c=11.0111 Å, $\alpha=85.6411^\circ$ , $\beta=89.6391^\circ$ , $\gamma=67.0233^\circ$ |         |          |          |          |               |
| number                                                                                                       | element | x        | y        | z        | Wyckoff index |
| 1                                                                                                            | Si      | 0.882965 | 0.542524 | 0.855510 | 2i x, y, z    |

|    |    |          |          |          |            |
|----|----|----------|----------|----------|------------|
| 2  | Si | 0.802112 | 0.363738 | 0.626477 | 2i x, y, z |
| 3  | Si | 0.395988 | 0.968024 | 0.631328 | 2i x, y, z |
| 4  | Si | 0.240824 | 0.898727 | 0.893619 | 2i x, y, z |
| 5  | Si | 0.739786 | 0.075173 | 0.830319 | 2i x, y, z |
| 6  | Si | 0.919102 | 0.867137 | 0.586497 | 2i x, y, z |
| 7  | Si | 0.317817 | 0.463664 | 0.658446 | 2i x, y, z |
| 8  | Si | 0.369405 | 0.398353 | 0.940538 | 2i x, y, z |
| 9  | O  | 0.931399 | 0.422554 | 0.729392 | 2i x, y, z |
| 10 | O  | 0.338870 | 0.940680 | 0.768260 | 2i x, y, z |
| 11 | O  | 0.529317 | 0.682433 | 0.203189 | 2i x, y, z |
| 12 | O  | 0.899406 | 0.301721 | 0.298680 | 2i x, y, z |
| 13 | O  | 0.133044 | 0.353369 | 0.930644 | 2i x, y, z |
| 14 | O  | 0.516645 | 0.540011 | 0.615808 | 2i x, y, z |
| 15 | O  | 0.678515 | 0.828101 | 0.605101 | 2i x, y, z |
| 16 | O  | 0.959392 | 0.098957 | 0.887406 | 2i x, y, z |
| 17 | O  | 0.761408 | 0.823419 | 0.837721 | 2i x, y, z |
| 18 | O  | 0.816958 | 0.109618 | 0.675802 | 2i x, y, z |
| 19 | O  | 0.339610 | 0.235153 | 0.609571 | 2i x, y, z |
| 20 | O  | 0.205730 | 0.675317 | 0.904777 | 2i x, y, z |
| 21 | O  | 0.393605 | 0.877595 | 0.018065 | 2i x, y, z |
| 22 | O  | 0.193897 | 0.956247 | 0.544779 | 2i x, y, z |
| 23 | O  | 0.899674 | 0.367661 | 0.494836 | 2i x, y, z |
| 24 | O  | 0.638849 | 0.543578 | 0.911054 | 2i x, y, z |

(g)  $P1^{(2)}$ , 50 GPa

| space group $P1$ No. 1                                                                                         |         |          |          |          |               |
|----------------------------------------------------------------------------------------------------------------|---------|----------|----------|----------|---------------|
| a=11.7093 Å, b=11.2923 Å, c=10.2365 Å, $\alpha=91.4108^\circ$ , $\beta=77.5664^\circ$ , $\gamma=87.5721^\circ$ |         |          |          |          |               |
| number                                                                                                         | element | x        | y        | z        | Wyckoff index |
| 1                                                                                                              | Si      | 0.028676 | 0.342618 | 0.133863 | 1a x, y, z    |
| 2                                                                                                              | Si      | 0.583428 | 0.972276 | 0.874940 | 1a x, y, z    |
| 3                                                                                                              | Si      | 0.729095 | 0.145669 | 0.837733 | 1a x, y, z    |
| 4                                                                                                              | Si      | 0.795529 | 0.266682 | 0.084616 | 1a x, y, z    |
| 5                                                                                                              | Si      | 0.041854 | 0.266669 | 0.585066 | 1a x, y, z    |
| 6                                                                                                              | Si      | 0.355607 | 0.392129 | 0.336062 | 1a x, y, z    |
| 7                                                                                                              | Si      | 0.092151 | 0.464286 | 0.382627 | 1a x, y, z    |
| 8                                                                                                              | Si      | 0.402569 | 0.092031 | 0.633128 | 1a x, y, z    |
| 9                                                                                                              | Si      | 0.915594 | 0.009596 | 0.086962 | 1a x, y, z    |
| 10                                                                                                             | Si      | 0.602469 | 0.391349 | 0.832702 | 1a x, y, z    |
| 11                                                                                                             | Si      | 0.967173 | 0.212806 | 0.884283 | 1a x, y, z    |
| 12                                                                                                             | Si      | 0.480963 | 0.139219 | 0.336659 | 1a x, y, z    |
| 13                                                                                                             | Si      | 0.279118 | 0.340830 | 0.633103 | 1a x, y, z    |
| 14                                                                                                             | Si      | 0.218161 | 0.214951 | 0.383360 | 1a x, y, z    |

|    |    |          |          |          |            |
|----|----|----------|----------|----------|------------|
| 15 | Si | 0.151493 | 0.092155 | 0.133333 | 1a x, y, z |
| 16 | Si | 0.417411 | 0.518219 | 0.582120 | 1a x, y, z |
| 17 | Si | 0.693297 | 0.904868 | 0.036991 | 1a x, y, z |
| 18 | Si | 0.844877 | 0.462353 | 0.882651 | 1a x, y, z |
| 19 | Si | 0.981708 | 0.639751 | 0.836987 | 1a x, y, z |
| 20 | Si | 0.522853 | 0.769682 | 0.079622 | 1a x, y, z |
| 21 | Si | 0.802449 | 0.760688 | 0.591197 | 1a x, y, z |
| 22 | Si | 0.696024 | 0.815630 | 0.430575 | 1a x, y, z |
| 23 | Si | 0.845970 | 0.969632 | 0.379443 | 1a x, y, z |
| 24 | Si | 0.655147 | 0.584869 | 0.626230 | 1a x, y, z |
| 25 | Si | 0.163726 | 0.518583 | 0.084821 | 1a x, y, z |
| 26 | Si | 0.349826 | 0.893234 | 0.837068 | 1a x, y, z |
| 27 | Si | 0.215076 | 0.715424 | 0.885177 | 1a x, y, z |
| 28 | Si | 0.227794 | 0.642369 | 0.335710 | 1a x, y, z |
| 29 | Si | 0.033278 | 0.839580 | 0.632484 | 1a x, y, z |
| 30 | Si | 0.460569 | 0.725997 | 0.388446 | 1a x, y, z |
| 31 | Si | 0.896684 | 0.591224 | 0.142550 | 1a x, y, z |
| 32 | Si | 0.166517 | 0.017604 | 0.585415 | 1a x, y, z |
| 33 | Si | 0.526498 | 0.341301 | 0.133767 | 1a x, y, z |
| 34 | Si | 0.090558 | 0.965193 | 0.885449 | 1a x, y, z |
| 35 | Si | 0.228196 | 0.142900 | 0.835586 | 1a x, y, z |
| 36 | Si | 0.289612 | 0.269208 | 0.086303 | 1a x, y, z |
| 37 | Si | 0.540025 | 0.270291 | 0.582980 | 1a x, y, z |
| 38 | Si | 0.854219 | 0.395367 | 0.335188 | 1a x, y, z |
| 39 | Si | 0.596900 | 0.474575 | 0.383067 | 1a x, y, z |
| 40 | Si | 0.903857 | 0.090256 | 0.633827 | 1a x, y, z |
| 41 | Si | 0.409671 | 0.019374 | 0.088903 | 1a x, y, z |
| 42 | Si | 0.104328 | 0.390731 | 0.835068 | 1a x, y, z |
| 43 | Si | 0.464621 | 0.217398 | 0.883633 | 1a x, y, z |
| 44 | Si | 0.979049 | 0.146011 | 0.334755 | 1a x, y, z |
| 45 | Si | 0.779540 | 0.340142 | 0.633139 | 1a x, y, z |
| 46 | Si | 0.715995 | 0.218092 | 0.386195 | 1a x, y, z |
| 47 | Si | 0.651643 | 0.105075 | 0.145560 | 1a x, y, z |
| 48 | Si | 0.917910 | 0.515426 | 0.584452 | 1a x, y, z |
| 49 | Si | 0.273110 | 0.841262 | 0.135407 | 1a x, y, z |
| 50 | Si | 0.340067 | 0.465479 | 0.882261 | 1a x, y, z |
| 51 | Si | 0.477867 | 0.640738 | 0.830661 | 1a x, y, z |
| 52 | Si | 0.036100 | 0.769724 | 0.085876 | 1a x, y, z |
| 53 | Si | 0.289821 | 0.767417 | 0.586513 | 1a x, y, z |
| 54 | Si | 0.102643 | 0.893384 | 0.335429 | 1a x, y, z |
| 55 | Si | 0.341749 | 0.962893 | 0.383838 | 1a x, y, z |
| 56 | Si | 0.154814 | 0.588676 | 0.633048 | 1a x, y, z |
| 57 | Si | 0.668063 | 0.503753 | 0.075340 | 1a x, y, z |



|     |    |          |          |          |            |
|-----|----|----------|----------|----------|------------|
| 58  | Si | 0.860813 | 0.887951 | 0.828956 | 1a x, y, z |
| 59  | Si | 0.721595 | 0.709245 | 0.879203 | 1a x, y, z |
| 60  | Si | 0.659258 | 0.692244 | 0.206004 | 1a x, y, z |
| 61  | Si | 0.523379 | 0.844376 | 0.638587 | 1a x, y, z |
| 62  | Si | 0.965388 | 0.716275 | 0.382284 | 1a x, y, z |
| 63  | Si | 0.402065 | 0.584484 | 0.132470 | 1a x, y, z |
| 64  | Si | 0.664534 | 0.019744 | 0.583892 | 1a x, y, z |
| 65  | O  | 0.852994 | 0.321993 | 0.932732 | 1a x, y, z |
| 66  | O  | 0.709845 | 0.175167 | 0.001861 | 1a x, y, z |
| 67  | O  | 0.031222 | 0.406870 | 0.533886 | 1a x, y, z |
| 68  | O  | 0.171535 | 0.557228 | 0.467781 | 1a x, y, z |
| 69  | O  | 0.727167 | 0.077441 | 0.437270 | 1a x, y, z |
| 70  | O  | 0.836164 | 0.424334 | 0.502525 | 1a x, y, z |
| 71  | O  | 0.047234 | 0.307098 | 0.967656 | 1a x, y, z |
| 72  | O  | 0.407211 | 0.157291 | 0.034421 | 1a x, y, z |
| 73  | O  | 0.881348 | 0.340173 | 0.164138 | 1a x, y, z |
| 74  | O  | 0.583627 | 0.118724 | 0.850537 | 1a x, y, z |
| 75  | O  | 0.988468 | 0.488322 | 0.868901 | 1a x, y, z |
| 76  | O  | 0.417615 | 0.868614 | 0.120529 | 1a x, y, z |
| 77  | O  | 0.048879 | 0.114536 | 0.619627 | 1a x, y, z |
| 78  | O  | 0.504488 | 0.395002 | 0.302226 | 1a x, y, z |
| 79  | O  | 0.209988 | 0.367078 | 0.349645 | 1a x, y, z |
| 80  | O  | 0.395313 | 0.242890 | 0.599353 | 1a x, y, z |
| 81  | O  | 0.764411 | 0.998381 | 0.104646 | 1a x, y, z |
| 82  | O  | 0.692688 | 0.465764 | 0.910777 | 1a x, y, z |
| 83  | O  | 0.877211 | 0.137774 | 0.803935 | 1a x, y, z |
| 84  | O  | 0.536636 | 0.204529 | 0.183587 | 1a x, y, z |
| 85  | O  | 0.191488 | 0.265281 | 0.552853 | 1a x, y, z |
| 86  | O  | 0.363621 | 0.239831 | 0.369297 | 1a x, y, z |
| 87  | O  | 0.091513 | 0.034258 | 0.284250 | 1a x, y, z |
| 88  | O  | 0.505093 | 0.594466 | 0.665037 | 1a x, y, z |
| 89  | O  | 0.736197 | 0.188924 | 0.220119 | 1a x, y, z |
| 90  | O  | 0.718040 | 0.282047 | 0.783386 | 1a x, y, z |
| 91  | O  | 0.860896 | 0.431558 | 0.718004 | 1a x, y, z |
| 92  | O  | 0.572487 | 0.010241 | 0.054097 | 1a x, y, z |
| 93  | O  | 0.164836 | 0.448746 | 0.684125 | 1a x, y, z |
| 94  | O  | 0.397033 | 0.049920 | 0.250665 | 1a x, y, z |
| 95  | O  | 0.067801 | 0.216556 | 0.416672 | 1a x, y, z |
| 96  | O  | 0.522189 | 0.299116 | 0.749740 | 1a x, y, z |
| 97  | O  | 0.603377 | 0.829648 | 0.937736 | 1a x, y, z |
| 98  | O  | 0.961327 | 0.673207 | 0.000533 | 1a x, y, z |
| 99  | O  | 0.778331 | 0.903733 | 0.533665 | 1a x, y, z |
| 100 | O  | 0.921523 | 0.058897 | 0.468157 | 1a x, y, z |

|     |   |          |          |          |            |
|-----|---|----------|----------|----------|------------|
| 101 | O | 0.976091 | 0.575271 | 0.434927 | 1a x, y, z |
| 102 | O | 0.588299 | 0.918057 | 0.503399 | 1a x, y, z |
| 103 | O | 0.796505 | 0.808350 | 0.962900 | 1a x, y, z |
| 104 | O | 0.656192 | 0.653623 | 0.035944 | 1a x, y, z |
| 105 | O | 0.128057 | 0.841385 | 0.166081 | 1a x, y, z |
| 106 | O | 0.332987 | 0.618124 | 0.849067 | 1a x, y, z |
| 107 | O | 0.236047 | 0.991033 | 0.869481 | 1a x, y, z |
| 108 | O | 0.174092 | 0.366324 | 0.118960 | 1a x, y, z |
| 109 | O | 0.299766 | 0.614799 | 0.619436 | 1a x, y, z |
| 110 | O | 0.250065 | 0.891617 | 0.303443 | 1a x, y, z |
| 111 | O | 0.959911 | 0.868751 | 0.351385 | 1a x, y, z |
| 112 | O | 0.146759 | 0.741146 | 0.600379 | 1a x, y, z |
| 113 | O | 0.020875 | 0.493033 | 0.099437 | 1a x, y, z |
| 114 | O | 0.439254 | 0.968714 | 0.918738 | 1a x, y, z |
| 115 | O | 0.129760 | 0.639458 | 0.802701 | 1a x, y, z |
| 116 | O | 0.293485 | 0.700027 | 0.184615 | 1a x, y, z |
| 117 | O | 0.946654 | 0.764341 | 0.554128 | 1a x, y, z |
| 118 | O | 0.611464 | 0.733264 | 0.364339 | 1a x, y, z |
| 119 | O | 0.343755 | 0.533007 | 0.283740 | 1a x, y, z |
| 120 | O | 0.253860 | 0.092633 | 0.666540 | 1a x, y, z |
| 121 | O | 0.983403 | 0.683838 | 0.219404 | 1a x, y, z |
| 122 | O | 0.468751 | 0.784413 | 0.787041 | 1a x, y, z |
| 123 | O | 0.108640 | 0.933101 | 0.718984 | 1a x, y, z |
| 124 | O | 0.314411 | 0.515666 | 0.051484 | 1a x, y, z |
| 125 | O | 0.914082 | 0.948427 | 0.682430 | 1a x, y, z |
| 126 | O | 0.648865 | 0.548251 | 0.237048 | 1a x, y, z |
| 127 | O | 0.313640 | 0.716119 | 0.417843 | 1a x, y, z |
| 128 | O | 0.273436 | 0.799411 | 0.751906 | 1a x, y, z |
| 129 | O | 0.351931 | 0.325322 | 0.934951 | 1a x, y, z |
| 130 | O | 0.211574 | 0.175763 | 0.000564 | 1a x, y, z |
| 131 | O | 0.528753 | 0.409892 | 0.533772 | 1a x, y, z |
| 132 | O | 0.670039 | 0.553053 | 0.471067 | 1a x, y, z |
| 133 | O | 0.228026 | 0.074774 | 0.434831 | 1a x, y, z |
| 134 | O | 0.335429 | 0.425234 | 0.500489 | 1a x, y, z |
| 135 | O | 0.546614 | 0.308479 | 0.965891 | 1a x, y, z |
| 136 | O | 0.905441 | 0.154238 | 0.033629 | 1a x, y, z |
| 137 | O | 0.377904 | 0.343220 | 0.166179 | 1a x, y, z |
| 138 | O | 0.083573 | 0.116987 | 0.848611 | 1a x, y, z |
| 139 | O | 0.486311 | 0.490597 | 0.866626 | 1a x, y, z |
| 140 | O | 0.931419 | 0.869816 | 0.117923 | 1a x, y, z |
| 141 | O | 0.548165 | 0.114767 | 0.618802 | 1a x, y, z |
| 142 | O | 0.005871 | 0.389215 | 0.303265 | 1a x, y, z |
| 143 | O | 0.708324 | 0.369235 | 0.349191 | 1a x, y, z |

|     |   |          |          |          |            |
|-----|---|----------|----------|----------|------------|
| 144 | O | 0.895537 | 0.241040 | 0.600679 | 1a x, y, z |
| 145 | O | 0.267020 | 0.994013 | 0.099824 | 1a x, y, z |
| 146 | O | 0.191546 | 0.466791 | 0.915193 | 1a x, y, z |
| 147 | O | 0.378222 | 0.141527 | 0.803283 | 1a x, y, z |
| 148 | O | 0.040448 | 0.201515 | 0.184007 | 1a x, y, z |
| 149 | O | 0.690169 | 0.266516 | 0.554408 | 1a x, y, z |
| 150 | O | 0.861927 | 0.242671 | 0.371219 | 1a x, y, z |
| 151 | O | 0.591480 | 0.041661 | 0.281767 | 1a x, y, z |
| 152 | O | 0.005272 | 0.589895 | 0.666410 | 1a x, y, z |
| 153 | O | 0.234967 | 0.183755 | 0.217628 | 1a x, y, z |
| 154 | O | 0.218632 | 0.282907 | 0.784251 | 1a x, y, z |
| 155 | O | 0.359754 | 0.434088 | 0.717131 | 1a x, y, z |
| 156 | O | 0.066650 | 0.017599 | 0.050960 | 1a x, y, z |
| 157 | O | 0.664000 | 0.448994 | 0.685102 | 1a x, y, z |
| 158 | O | 0.898247 | 0.053835 | 0.249835 | 1a x, y, z |
| 159 | O | 0.566494 | 0.219525 | 0.417239 | 1a x, y, z |
| 160 | O | 0.023417 | 0.297588 | 0.750768 | 1a x, y, z |
| 161 | O | 0.102890 | 0.824650 | 0.933089 | 1a x, y, z |
| 162 | O | 0.459132 | 0.673129 | 0.998772 | 1a x, y, z |
| 163 | O | 0.278558 | 0.907823 | 0.537316 | 1a x, y, z |
| 164 | O | 0.422545 | 0.056436 | 0.469315 | 1a x, y, z |
| 165 | O | 0.476735 | 0.579653 | 0.433198 | 1a x, y, z |
| 166 | O | 0.086200 | 0.925072 | 0.501440 | 1a x, y, z |
| 167 | O | 0.296351 | 0.808787 | 0.968831 | 1a x, y, z |
| 168 | O | 0.155352 | 0.658664 | 0.035209 | 1a x, y, z |
| 169 | O | 0.621430 | 0.829960 | 0.159565 | 1a x, y, z |
| 170 | O | 0.835783 | 0.615535 | 0.848997 | 1a x, y, z |
| 171 | O | 0.733722 | 0.983839 | 0.878058 | 1a x, y, z |
| 172 | O | 0.674087 | 0.361288 | 0.116196 | 1a x, y, z |
| 173 | O | 0.799106 | 0.613138 | 0.622069 | 1a x, y, z |
| 174 | O | 0.758626 | 0.893259 | 0.311354 | 1a x, y, z |
| 175 | O | 0.447804 | 0.864673 | 0.350680 | 1a x, y, z |
| 176 | O | 0.648204 | 0.745557 | 0.590717 | 1a x, y, z |
| 177 | O | 0.519607 | 0.489940 | 0.093956 | 1a x, y, z |
| 178 | O | 0.940551 | 0.965397 | 0.914774 | 1a x, y, z |
| 179 | O | 0.628327 | 0.644269 | 0.801695 | 1a x, y, z |
| 180 | O | 0.794537 | 0.699578 | 0.178949 | 1a x, y, z |
| 181 | O | 0.439391 | 0.767605 | 0.556091 | 1a x, y, z |
| 182 | O | 0.111888 | 0.739671 | 0.368451 | 1a x, y, z |
| 183 | O | 0.847469 | 0.526381 | 0.281594 | 1a x, y, z |
| 184 | O | 0.753158 | 0.088237 | 0.670143 | 1a x, y, z |
| 185 | O | 0.490750 | 0.682135 | 0.215946 | 1a x, y, z |
| 186 | O | 0.970015 | 0.780535 | 0.783252 | 1a x, y, z |

|     |   |          |          |          |            |
|-----|---|----------|----------|----------|------------|
| 187 | O | 0.608960 | 0.933738 | 0.718304 | 1a x, y, z |
| 188 | O | 0.816204 | 0.511562 | 0.049385 | 1a x, y, z |
| 189 | O | 0.413166 | 0.951601 | 0.687605 | 1a x, y, z |
| 190 | O | 0.148623 | 0.549926 | 0.250718 | 1a x, y, z |
| 191 | O | 0.815701 | 0.721798 | 0.424020 | 1a x, y, z |
| 192 | O | 0.773494 | 0.798121 | 0.749622 | 1a x, y, z |
